# Supplementary material for: Micellization of a starch–poly(1,4-butylene succinate) nano-hybrid for enhanced energy storage
Source: Royal Society of Chemistry journal article supplement (doi:10.1039/d1ra00635e), 2021-01-01
Supplement: d1ra00635e1.pdf [file d1ra00635e1.pdf]

## Micellization of starch- poly (1,4-butylene succinate) nano-hybrid for enhanced energy storage.

O.D. Saliu, M. A Mamo\*, P. G. Ndungu\*, and J. Ramontja\*

Energy, Sensors and Multifunctional Nanomaterials Research Group, Department of Chemical Sciences, University of Johannesburg, P.O. Box 17011, Doornfontein 2028 Johannesburg, South Africa

\*Corresponding Authors: [messaim@uj.ac.za](mailto:messaim@uj.ac.za), [jamesr@uj.ac.za](mailto:jamesr@uj.ac.za); [pndungu@uj.ac.za](mailto:pndungu@uj.ac.za)

### Supplementary Information

The specific capacitance,  $C_{sp}$ , was calculated using the following equation<sup>1,2</sup>:

$$C_{sp} = \frac{I\Delta V}{2mv\Delta V}$$

Where  $I\Delta V$  is obtained as the area of the CV curve,  $m$  is the mass of active material loaded,  $v$  is the scan rate in  $mVs^{-1}$ ,  $\Delta V$  is the potential window.

The energy density ( $E_d$ ) was calculated using the following equation<sup>1,2</sup>:

$$E_d = \frac{1}{2}C_{sp}V^2$$

Where  $C_{sp}$  is the specific capacitance and  $V$  is the nominal voltage.

Finally, the power density,  $P_d$ , was calculated using the following equation<sup>1,2</sup>:

$$P = \frac{V^2}{4ESR * m}$$

Where  $V$  is the nominal voltage,  $ESR$  is the equivalent series resistance, and  $m$  is the mass of active material loaded.

**Table S1:** The specific capacitances of the ordinary St-PBS hybrid, St-PBS micelle I, St-PBS micelle II and St-PBS micelle III, calculated from the CV curves obtained from a two-electrode configuration (symmetrical cell), and compared with the three electrode measurements.

|                                                | Scan rate (mV/s)                     | 200 | 100 | 50  | 20  | 10  | 5   |
|------------------------------------------------|--------------------------------------|-----|-----|-----|-----|-----|-----|
| Three electrode configuration                  | St-PBS ( $C_{sp}/ Fg^{-1}$ )         | 42  | 81  | 122 | 187 | 236 | 301 |
|                                                | St-PBS Mic I ( $C_{sp}/ Fg^{-1}$ )   | 49  | 89  | 143 | 195 | 250 | 324 |
|                                                | St-PBS Mic II ( $C_{sp}/ Fg^{-1}$ )  | 75  | 129 | 247 | 391 | 483 | 584 |
|                                                | St-PBS Mic III ( $C_{sp}/ Fg^{-1}$ ) | 48  | 88  | 131 | 190 | 243 | 318 |
| Two electrode configuration (Symmetrical Cell) | St-PBS ( $C_{sp}/ Fg^{-1}$ )         | 66  | 83  | 109 | 118 | 132 | 147 |
|                                                | St-PBS Mic I ( $C_{sp}/ Fg^{-1}$ )   | 101 | 126 | 144 | 152 | 170 | 182 |
|                                                | St-PBS Mic II ( $C_{sp}/ Fg^{-1}$ )  | 106 | 140 | 159 | 181 | 185 | 203 |

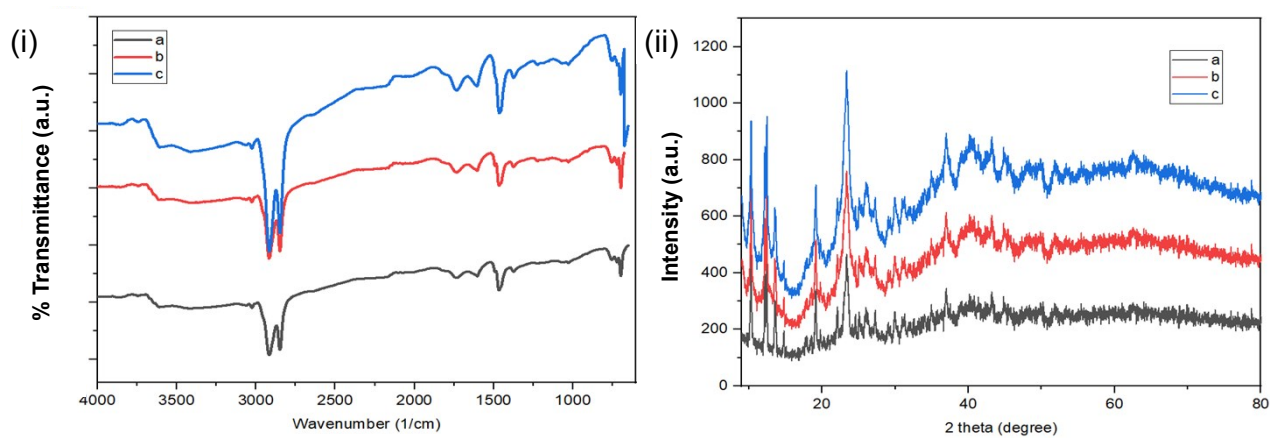

**Figure S1:** Image (i) presents the FTIR data and image (ii) are the XRD patterns for the St-PBS-I- $Fe_3O_4$ , St-PBS-II- $Fe_3O_4$ , and St-PBS-III- $Fe_3O_4$ .

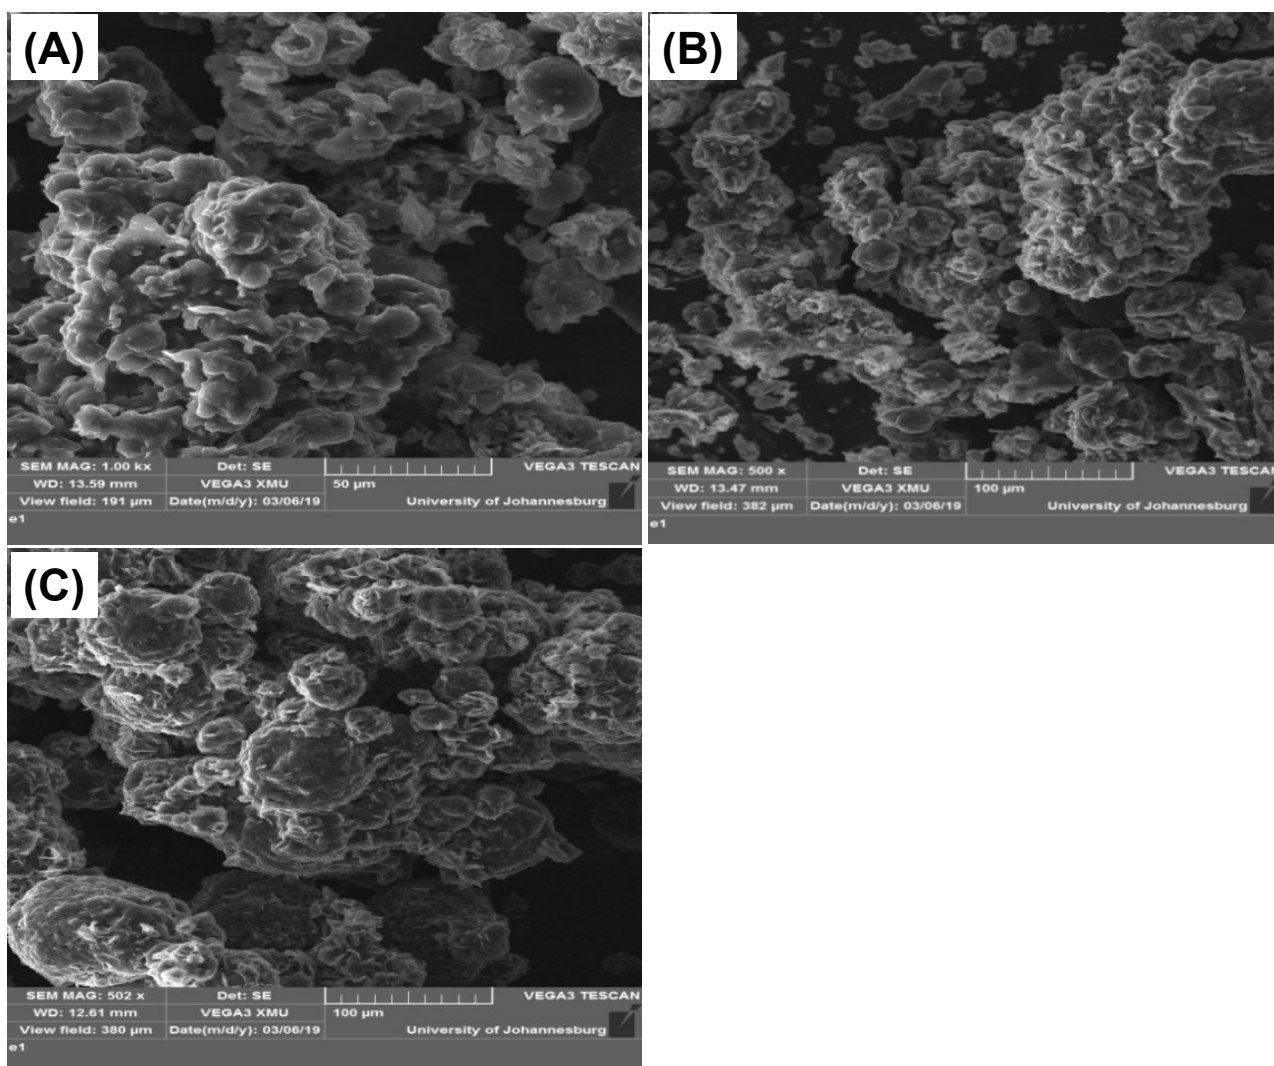

**Figure S2:** SEM images of the (a) St-PBS-I-Fe<sub>3</sub>O<sub>4</sub>, (b) St-PBS-II-Fe<sub>3</sub>O<sub>4</sub>, and (c) St-PBS-III-Fe<sub>3</sub>O<sub>4</sub> samples.

**Table S2:** The specific capacitances of the magnetite incorporated St-PBS micelle I, St-PBS micelle II and St-PBS micelle III, calculated from the CV curves obtained from a two-electrode configuration (symmetrical cell), and compared with the three electrode measurements.

|                                      | Scan rate (mV/s)                                               | 200                                                          | 100 | 50  | 20  | 10  | 5   |
|--------------------------------------|----------------------------------------------------------------|--------------------------------------------------------------|-----|-----|-----|-----|-----|
|                                      | <b>Two electrode configuration (Symmetrical Cell)</b>          | St-PBS-I-Fe <sub>3</sub> O <sub>4</sub> ( $C_{sp}/Fg^{-1}$ ) | 107 | 164 | 183 | 237 | 277 |
|                                      | St-PBS-II-Fe <sub>3</sub> O <sub>4</sub> ( $C_{sp}/Fg^{-1}$ )  | 124                                                          | 168 | 218 | 263 | 295 | 308 |
|                                      | St-PBS-III-Fe <sub>3</sub> O <sub>4</sub> ( $C_{sp}/Fg^{-1}$ ) | 109                                                          | 160 | 202 | 241 | 284 | 291 |
| <b>Three electrode configuration</b> | St-PBS-I-Fe <sub>3</sub> O <sub>4</sub> ( $C_{sp}/Fg^{-1}$ )   | 86                                                           | 173 | 288 | 435 | 527 | 608 |
|                                      | St-PBS-II-Fe <sub>3</sub> O <sub>4</sub> ( $C_{sp}/Fg^{-1}$ )  | 108                                                          | 172 | 309 | 442 | 532 | 631 |
|                                      | St-PBS-III-Fe <sub>3</sub> O <sub>4</sub> ( $C_{sp}/Fg^{-1}$ ) | 79                                                           | 154 | 278 | 393 | 484 | 589 |

## References

- 1 Y. Ko, M. Kwon, W. K. Bae, B. Lee, S. W. Lee and J. Cho, *Nat. Commun.*, 2017, **8**, 536.
- 2 D. Ghosh, S. Giri, M. Moniruzzaman, T. Basu, M. Mandal and C. K. Das, *Dalt. Trans.*, 2014, **43**, 11067–11076.
